# Supplementary material
Source: PubMed Central journal article supplement (PMC3832278)
Supplement: supp_113.157198_FigureS6.pdf [file supp_113.157198_FigureS6.pdf]

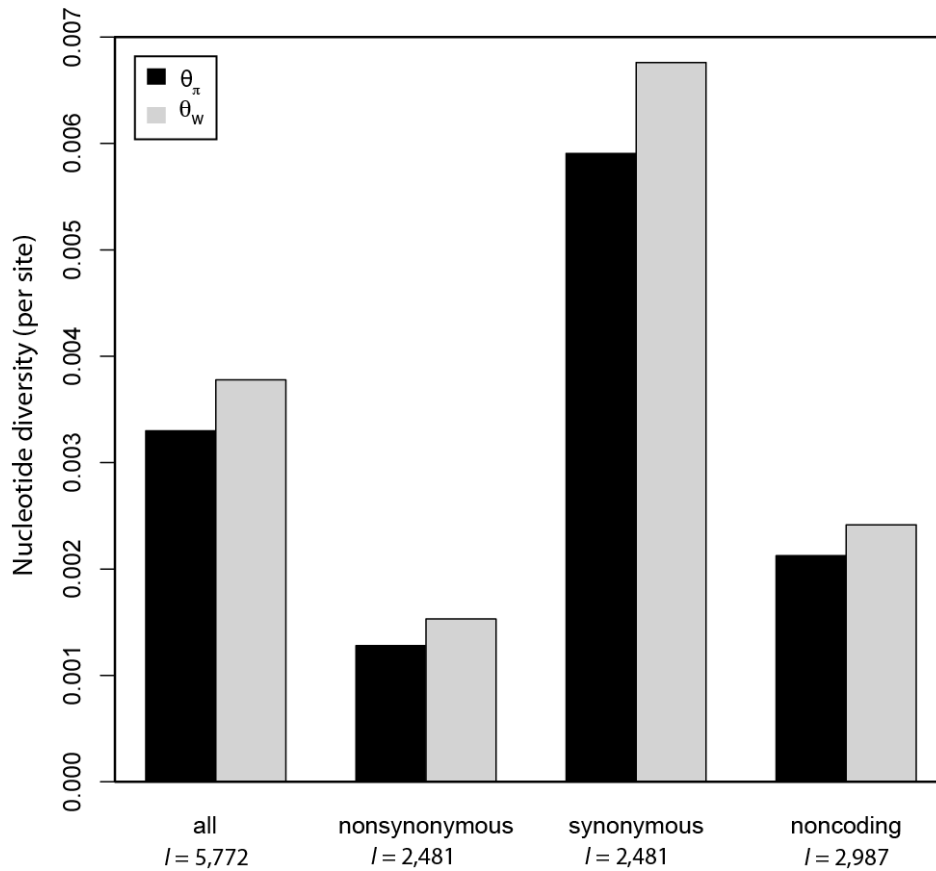

**Figure S6** Average nucleotide diversity for all and annotated amplicons ( $l$  = number of loci or amplicons). Averages are weighted averages using coverage classes as the weights.
