# Supplementary material
Source: PubMed Central journal article supplement (PMC3832278)
Supplement: supp_113.157198_TableS3.pdf [file supp_113.157198_TableS3.pdf]

**Table S3 A summary of statistical tests used to assess the effects of coverage variation on basic alignment summaries.**

| Measure                                 | Statistical Test | Statistical Test Results                     | Interpretation                                                                                                     |
|-----------------------------------------|------------------|----------------------------------------------|--------------------------------------------------------------------------------------------------------------------|
| Nucleotide diversity ( $\theta_{\pi}$ ) | Kruskal-Wallis   | $\chi^2 = 97.63$ , $df=16$ , $P = 9.62e-14$  | Average ranks of diversity vary significantly across coverage classes                                              |
| Nucleotide divergence (Pira)            | Kruskal-Wallis   | $\chi^2 = 95.61$ , $df=16$ , $P = 2.29e-14$  | Average ranks of divergence vary significantly across coverage classes                                             |
| Nucleotide divergence (Pila)            | Kruskal-Wallis   | $\chi^2 = 29.41$ , $df=16$ , $P = 0.02134$   | Average ranks of divergence vary significantly across coverage classes                                             |
| The number of SNPs                      | Kruskal-Wallis   | $\chi^2 = 174.31$ , $df=16$ , $P < 2.2e-16$  | Average ranks of SNPs vary significantly across coverage classes                                                   |
| Alignment length (bp)                   | Kruskal-Wallis   | $\chi^2 = 236.24$ , $df=16$ , $P < 2.2e-16$  | Average ranks of alignment lengths vary significantly across coverage classes                                      |
| Noncoding sites (bp)                    | Kruskal-Wallis   | $\chi^2 = 24.24$ , $df=16$ , $P = 0.08437$   | Average ranks of noncoding sites do not vary significantly across coverage classes                                 |
| Coding sites (bp)                       | Kruskal-Wallis   | $\chi^2 = 42.08$ , $df=16$ , $P = 0.00038$   | Average ranks of coding sites vary significantly across coverage classes                                           |
| The proportion of masked bases          | Goodness-of-fit  | $\chi^2 = 3559.68$ , $df=17$ , $P < 2.2e-16$ | Too few masked bases with high coverage, too many masked bases with low coverage                                   |
| Proportion of annotated genes           | Goodness-of-fit  | $\chi^2 = 16.64$ , $df=17$ , $P = 0.47900$   | Annotated genes within each coverage class occurred in proportion to overall fraction of genes that were annotated |
| Indels                                  | Goodness-of-fit  | $\chi^2 = 36.32$ , $df=16$ , $P = 0.00415$   | Too many indels at intermediate coverage classes                                                                   |
| OG (Pira)                               | Goodness-of-fit  | $\chi^2 = 418.84$ , $df=17$ , $P < 2.2e-16$  | Too many genes with Pira outgroup when coverage was high and too few when coverage was low.                        |
| OG (Pila)                               | Goodness-of-fit  | $\chi^2 = 171.03$ , $df=17$ , $P < 2.2e-16$  | Too many genes with Pila outgroup when coverage was high and too few when coverage was low.                        |

**Abbreviations:** bp, base pairs; Indels, insertion-deletion events; OG, outgroup present (i.e. either a single sequence of *Pinus lambertiana* or *P. radiata* or both is available for the amplicon); Pila, *Pinus lambertiana*; Pira, *Pinus radiata*; SNPs, single nucleotide polymorphisms.
