# Supplementary material
Source: PubMed Central journal article supplement (PMC3832278)
Supplement: supp_113.157198_TableS8.pdf [file supp_113.157198_TableS8.pdf]

**Table S8** Estimates for per site crossing over rate ( $C = 4N_e r$ ) and additional summary statistics related to linkage disequilibrium for each sample coverage class where  $n > 10$ . Values in parentheses are 95% confidence intervals based on bootstrapping across loci ( $n = 10,000$  replicates). Singletons were included.

| Coverage | Loci | $C$                      | LD-half (bp) <sup>a</sup> | $Z_{ns}$                 | $C/\theta_\pi$            |
|----------|------|--------------------------|---------------------------|--------------------------|---------------------------|
| 18       | 898  | 0.026<br>(0.017 – 0.042) | 102<br>(63 – 154)         | 0.266<br>(0.246 – 0.289) | 9.107<br>(7.161 – 17.585) |
| 17       | 755  | 0.023<br>(0.017 – 0.032) | 117<br>(85 – 159)         | 0.270<br>(0.248 – 0.295) | 8.129<br>(5.957 – 11.376) |
| 16       | 559  | 0.007<br>(0.001 – 0.025) | 386<br>(110 – 1390)       | 0.271<br>(0.243 – 0.299) | 2.317<br>(0.489 – 8.911)  |
| 15       | 374  | 0.021<br>(0.011 – 0.041) | 137<br>(69 – 255)         | 0.286<br>(0.253 – 0.319) | 5.740<br>(3.577 – 13.717) |
| 14       | 339  | 0.010<br>(0.004 – 0.020) | 288<br>(144 – 701)        | 0.314<br>(0.282 – 0.349) | 2.871<br>(1.159 – 5.771)  |
| 13       | 278  | 0.008<br>(0.001 – 0.031) | 360<br>(95 – 1392)        | 0.308<br>(0.271 – 0.347) | 2.564<br>(0.473 – 9.252)  |
| 12       | 276  | 0.006<br>(0.001 – 0.015) | 496<br>(193 – 1405)       | 0.327<br>(0.285 – 0.371) | 1.426<br>(0.517 – 5.033)  |
| 11       | 236  | 0.012<br>(0.004 – 0.028) | 274<br>(111 – 807)        | 0.361<br>(0.319 – 0.403) | 3.039<br>(0.910 – 6.856)  |

**Abbreviations:** bp, base pairs; LD, linkage disequilibrium;  $\theta_\pi$ , nucleotide diversity from the average number of pairwise differences;  $Z_{ns}$ , Kelly's statistic representing the average pairwise LD among SNPs within an amplicon.

<sup>a</sup>The distance in bp where the expected value of allelic correlations ( $r^2$ ) dropped to half its initial value.
